# Supplementary material
Source: MDPI journal article supplement (https://www.mdpi.com/1999-4907/12/6/755)
Supplement: s1 [file s1]

## Supplementary Information

**Table S1.** Climate inputs into ZELIG-CFS for Sioux Lookout, Ontario. Three separate climate scenarios were tested: current (1980 to 2010), representative concentration pathway (RCP) 2.6 (2020 to 2050), and RCP 4.5 (2020 to 2050). Numbers represent averages across 30 years and standard deviations in parentheses.

| Month     | Temperature (°C) |                |                | Precipitation (mm) |                 |                 |
|-----------|------------------|----------------|----------------|--------------------|-----------------|-----------------|
|           | Current          | RCP 2.6        | RCP 4.5        | Current            | RCP 2.6         | RCP 4.5         |
| January   | -17.4<br>(3.0)   | -14.6<br>(2.7) | -14.9<br>(2.2) | 33.6<br>(15.3)     | 34.9<br>(15.0)  | 28.6<br>(11.7)  |
| February  | -13.8<br>(2.8)   | -8.6<br>(3.1)  | -10.9<br>(2.9) | 25.7<br>(10.1)     | 22.5<br>(11.9)  | 26.8<br>(9.3)   |
| March     | -7.4<br>(2.0)    | -4.7<br>(2.4)  | -4.5<br>(2.3)  | 30.9<br>(16.9)     | 40.6<br>(25.7)  | 38.7<br>(17.1)  |
| April     | 2.2<br>(1.7)     | 4.7<br>(1.7)   | 5.4<br>(1.9)   | 37.4<br>(22.6)     | 64.8<br>(42.1)  | 41.5<br>(30.2)  |
| May       | 10.1<br>(1.8)    | 11.5<br>(1.7)  | 11.5<br>(1.9)  | 72.6<br>(30.9)     | 78.7<br>(33.0)  | 86.4<br>(48.5)  |
| June      | 15.6<br>(1.3)    | 18.4<br>(1.6)  | 18.0<br>(1.3)  | 120.4<br>(49.5)    | 101.5<br>(59.2) | 109.1<br>(40.9) |
| July      | 18.4<br>(1.0)    | 20.9<br>(1.2)  | 21.4<br>(0.9)  | 106.8<br>(32.6)    | 103.4<br>(19.1) | 102.9<br>(42.3) |
| August    | 17.1<br>(1.1)    | 21.3<br>(1.2)  | 20.7<br>(1.2)  | 85.5<br>(45.8)     | 70.5<br>(19.5)  | 80.5<br>(35.4)  |
| September | 11.4<br>(1.5)    | 15.7<br>(1.2)  | 14.3<br>(1.2)  | 88.7<br>(46.4)     | 99.1<br>(64.2)  | 101.9<br>(39.5) |
| October   | 4.2<br>(1.7)     | 6.3<br>(1.3)   | 6.9<br>(1.5)   | 64.8<br>(22.1)     | 78.7<br>(20.4)  | 74.5<br>(35.8)  |
| November  | -4.8<br>(1.9)    | -2.5<br>(2.3)  | -2.8<br>(2.0)  | 59.3<br>(21.8)     | 82.0<br>(38.7)  | 60.1<br>(23.9)  |
| December  | -14.0<br>(3.5)   | -12.6<br>(3.1) | -11.7<br>(2.9) | 38.3<br>(16.1)     | 32.4<br>(16.7)  | 34.4<br>(14.3)  |

**Table S2.** Climate inputs into ZELIG-CFS for Dryden, Ontario. Three separate climate scenarios were tested: current (1980 to 2010), representative concentration pathway (RCP) 2.6 (2020 to 2050), and RCP 4.5 (2020 to 2050). Numbers represent averages across 30 years with standard deviations in parentheses.

| Month     | Temperature (°C) |                |                | Precipitation (mm) |                 |                 |
|-----------|------------------|----------------|----------------|--------------------|-----------------|-----------------|
|           | Current          | RCP 2.6        | RCP 4.5        | Current            | RCP 2.6         | RCP 4.5         |
| January   | -17.6<br>(3.4)   | -14.2<br>(2.7) | -14.0<br>(2.5) | 21.9<br>(12.1)     | 26.4<br>(13.0)  | 23.1<br>(9.4)   |
| February  | -12.7<br>(3.2)   | -8<br>(2.8)    | -10.2<br>(3.0) | 19.4<br>(9.2)      | 14.4<br>(7.4)   | 20.6<br>(7.7)   |
| March     | -6.3<br>(2.7)    | -4.6<br>(2.3)  | -4.1<br>(2.0)  | 27.9<br>(17.4)     | 32.8<br>(20.5)  | 30.9<br>(13.5)  |
| April     | 2.6<br>(1.8)     | 5.4<br>(2.2)   | 6.5<br>(1.9)   | 41.5<br>(34.6)     | 47.1<br>(44.7)  | 38.9<br>(26.5)  |
| May       | 10.6<br>(1.6)    | 12.5<br>(1.9)  | 12.2<br>(1.5)  | 64.0<br>(26.0)     | 72.1<br>(40.5)  | 72.0<br>(44.0)  |
| June      | 16.0<br>(1.2)    | 18.7<br>(1.5)  | 18.0<br>(1.3)  | 102.2<br>(42.9)    | 100.4<br>(52.1) | 118.4<br>(43.9) |
| July      | 18.4<br>(1.0)    | 21.6<br>(0.9)  | 21.6<br>(0.8)  | 123.1<br>(41.6)    | 109.0<br>(25.0) | 104.3<br>(53.5) |
| August    | 17.9<br>(1.0)    | 21.6<br>(1.2)  | 20.8<br>(1.2)  | 87.0<br>(31.9)     | 70.2<br>(16.6)  | 83.6<br>(18.7)  |
| September | 11.4<br>(1.0)    | 15.4<br>(1.1)  | 14.2<br>(1.2)  | 87.0<br>(41.5)     | 80.1<br>(44.2)  | 106.1<br>(38.2) |
| October   | 4.7<br>(1.8)     | 6.7<br>(1.7)   | 7.2<br>(1.4)   | 52.4<br>(25.4)     | 60.4<br>(18.9)  | 70.1<br>(34.9)  |
| November  | -5.7<br>(2.3)    | -2.2<br>(2.1)  | -2.5<br>(2.1)  | 38.4<br>(17.1)     | 59.1<br>(39.3)  | 52.2<br>(19.7)  |
| December  | -14.3<br>(3.4)   | -11.4<br>(3.2) | -11.8<br>(3.2) | 27.0<br>(12.7)     | 23.4<br>(13.6)  | 26.9<br>(10.5)  |

**Table S3.** Climate inputs into ZELIG-CFS for Petawawa, Ontario. Three separate climate scenarios were tested: current (1980 to 2010), representative concentration pathway (RCP) 2.6 (2020 to 2050), and RCP 4.5 (2020 to 2050). Numbers represent averages across 30 years with standard deviations in parentheses.

| Month     | Temperature (°C) |               |               | Precipitation (mm) |                |                |
|-----------|------------------|---------------|---------------|--------------------|----------------|----------------|
|           | Current          | RCP 2.6       | RCP 4.5       | Current            | RCP 2.6        | RCP 4.5        |
| January   | -12.2<br>(2.2)   | -9.0<br>(2.2) | -9.8<br>(2.7) | 53.6<br>(19.7)     | 55.0<br>(15.2) | 44.6<br>(23.2) |
| February  | -10.2<br>(2.6)   | -7.4<br>(2.3) | -7.1<br>(2.4) | 45.7<br>(17.8)     | 48.7<br>(27.6) | 37.6<br>(21.3) |
| March     | -3.4<br>(1.9)    | -0.5<br>(1.7) | -2.2<br>(1.4) | 57.7<br>(31.9)     | 60.9<br>(20.4) | 46.4<br>(23.8) |
| April     | 5.4<br>(1.4)     | 7.1<br>(1.0)  | 7.8<br>(1.3)  | 61.4<br>(28.0)     | 80.2<br>(30.4) | 85.9<br>(44.6) |
| May       | 12.4<br>(1.1)    | 13.5<br>(1.0) | 14.0<br>(1.3) | 81.5<br>(28.5)     | 82.3<br>(34.2) | 99.9<br>(24.7) |
| June      | 16.8<br>(1.0)    | 19.1<br>(1.2) | 18.2<br>(1.1) | 76.9<br>(32.4)     | 83.6<br>(40.7) | 97.7<br>(27.9) |
| July      | 19.9<br>(1.0)    | 22.5<br>(0.9) | 22.1<br>(1.0) | 94.7<br>(40.7)     | 96.7<br>(66.5) | 75.1<br>(38.5) |
| August    | 18.3<br>(1.0)    | 21.7<br>(0.9) | 21.8<br>(1.1) | 79.4<br>(29.6)     | 92.9<br>(33.1) | 76.9<br>(22.8) |
| September | 13.9<br>(1.1)    | 17.2<br>(1)   | 16.1<br>(1.1) | 81.4<br>(29.6)     | 76.3<br>(31.7) | 69.7<br>(25.0) |
| October   | 7.4<br>(0.9)     | 9.2<br>(1.4)  | 9.2<br>(1.1)  | 79.6<br>(27.4)     | 88.7<br>(30.8) | 80.3<br>(29.5) |
| November  | 0.1<br>(1.4)     | 2.2<br>(1.4)  | 1.7<br>(1.3)  | 69.3<br>(18.3)     | 84.2<br>(32.5) | 69.6<br>(18.4) |
| December  | -7.6<br>(2.5)    | -6.4<br>(1.8) | -5.6<br>(1.5) | 63.1<br>(26.9)     | 70.1<br>(43.4) | 73.8<br>(33.6) |

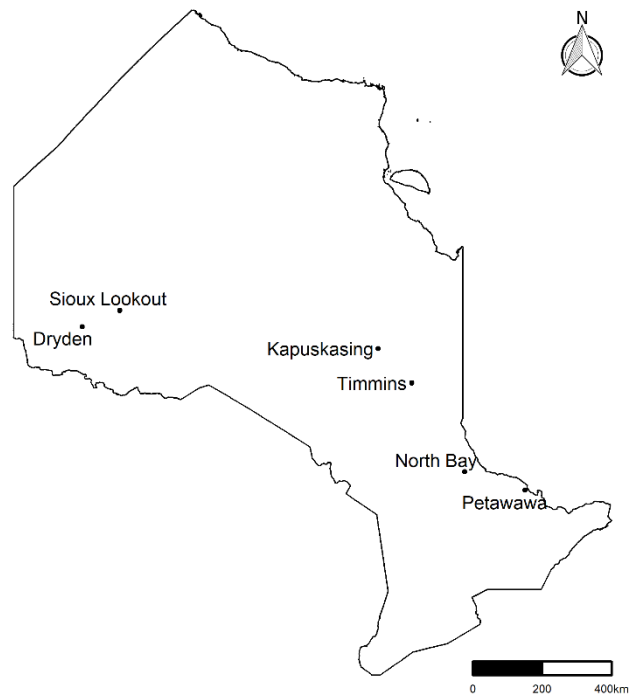

**Figure S1.** Location of NEBIE sites across Ontario, Canada.

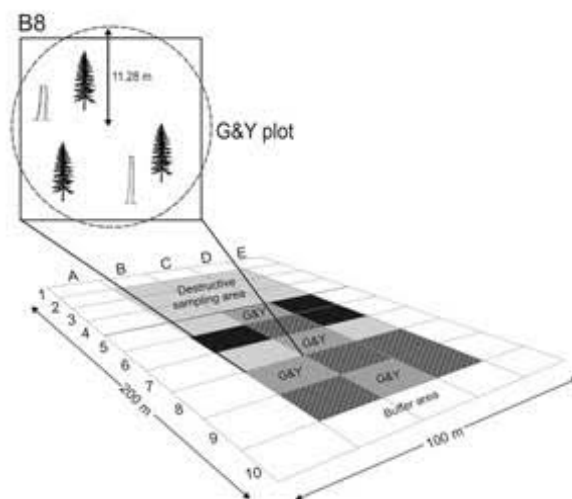

**Figure S2.** Experimental unit layout. Treatments were individually applied at the two-hectare unit scale with four sampling growth and yield plots randomly located in each experimental unit. For each treatment, four replicates of each experimental unit (i.e., 20 total units) were established at Sioux Lookout, Kapuskasing, Dryden, and Petawawa, Ontario, with three replicates (i.e., 15 total units) at Timmins and North Bay.
